# Supplementary material
Source: Springer Nature journal article supplement (https://www.springermedizin.de/resource/supplementary/13075_2010_9756_MOESM2_ESM.pdf/9693338)
Supplement: MOESM2 [file 9693338]

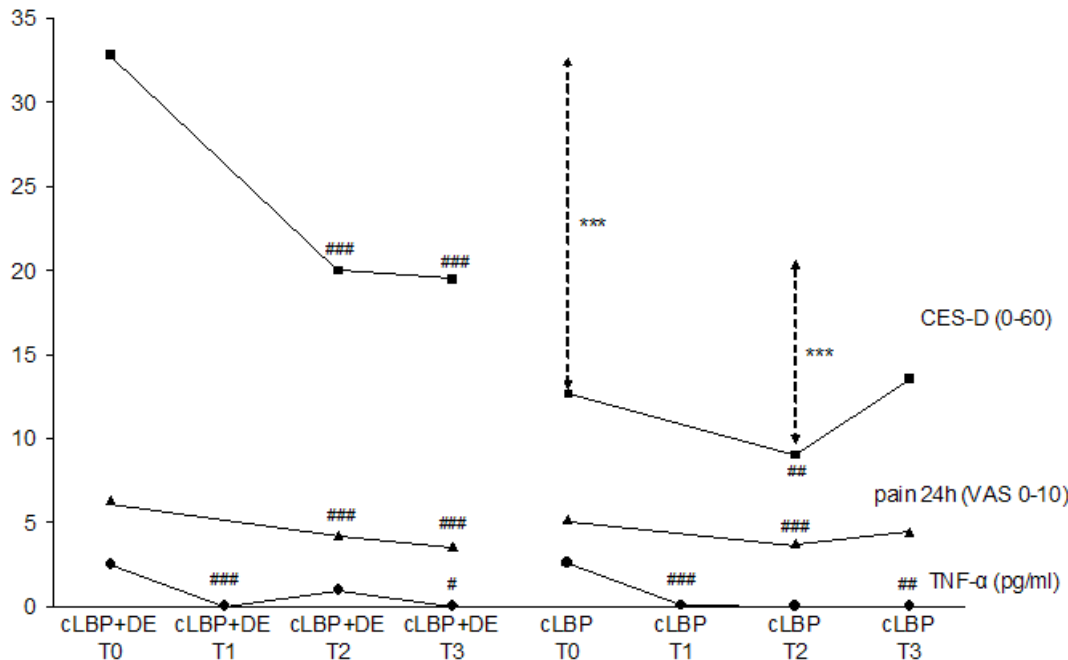

|            | cLBP+DE<br>T0 | cLBP+DE<br>T1 | cLBP+DE<br>T2 | cLBP+DE<br>T3 | cLBP<br>T0 | cLBP<br>T1 | cLBP<br>T2 | cLBP<br>T3 |
|------------|---------------|---------------|---------------|---------------|------------|------------|------------|------------|
| ■ CES-D    | 32,81         | n.c.          | 20            | 19,5          | 12,68      | n.c.       | 9          | 13,53      |
| ▲ pain 24h | 6,3           | n.c.          | 4,18          | 3,55          | 5,13       | n.c.       | 3,75       | 4,44       |
| ● TNFα     | 2,51          | 0             | 0,95          | 0             | 2,58       | 0,06       | 0          | 0          |
